# Supplementary material
Source: PubMed Central journal article supplement (PMC4992400)

1 Submitted to Molecular Microbiology, 3 March 2016

2 **Synergistic interaction of glyceraldehydes-3-phosphate dehydrogenase and ArsJ, a**  
3 **novel organoarsenical efflux permease, confers arsenate resistance**

4

5 **Jian Chen<sup>1</sup>, Masafumi Yoshinaga<sup>1</sup>, Luis D. Garbinski, and Barry P. Rosen\***

6

7 *Department of Cellular Biology and Pharmacology, Herbert Wertheim College of Medicine,*  
8 *Florida International University, Miami, Florida 33199, U.S.A.*

9

10 **Legends to the Supplemental Figures:**

11

12 **Figure 1S. Multiple alignment of GAPDH sequences.** The protein sequence of GAPDH from  
13 the *ars* operon of *P. aeruginosa* DK2 (WP\_003109848.1) is compared with GAPDH sequences  
14 of GapA (WP\_003116409.1) and GapB (AFM64157.1) from the chromosome of *P. aeruginosa*  
15 DK2, GapA from *E. coli* W3110 (BAA15576.1) and the European rabbit *Oryctolagus cuniculus*  
16 (NP\_001075722.1). Accession numbers are given in parentheses. The multiple alignment was  
17 calculated with CLUSTAL W. Black or gray boxes indicate sequence identity or similarity,  
18 respectively.

19

20 **Figure 2S. Multiple alignment of ArsJ sequences.** 2779 ArsJ entries in 2336 bacterial  
21 species were identified in the NCBI database, and seven representative sequences were  
22 analyzed. The protein sequence of ArsJ from *P. aeruginosa* DK2 (WP\_003109849) is  
23 compared with ArsJ sequences from *Shewanella putrefaciens* 200 (WP\_014610147),  
24 *Aeromonas media* (AHX62269), *Marinimicrobium agarilyticum* (WP\_027330587), *Bermanella*  
25 *marisrubri* (WP\_040298205), *Oceanimonas sp.* GK1 (WP\_014290953), *Marinobacter*  
26 *daepoensis* (WP\_029654587). Accession numbers are given in parentheses. The multiple

27 alignment was calculated with CLUSTAL W (Thompson *et al.*, 1994). Black or gray boxes  
28 indicate sequence identity or similarity, respectively.

29  
30 **Figure 3S. Arsenate and phosphate as substrates of GAPDH.** GAPDH activity was assayed  
31 as described in *Experimental procedures* with 1 unit of commercial rabbit GAPDH, 0.6 mM  
32  $\text{NAD}^+$ , 0.6 mM G3P, 10 mM DTT, with or without arsenate or phosphate, as indicated. Activity  
33 was estimated from the absorbance at 340 nm resulting from reduction of  $\text{NAD}^+$  to NADH. **A.**  
34 Arsenate addition: ( $\square$ ), no As(V); (o), 0.125 mM As(V); ( $\nabla$ ), 0.25 mM As(V); GAPDH catalyzed  
35 the phosphorolytic-arsenolytic reaction. **B.** Comparison of arsenate and phosphate: (o), no  
36 addition; ( $\nabla$ ), 50  $\mu\text{M}$  As(V); ( $\square$ ), 50  $\mu\text{M}$   $\text{Na}_2\text{HPO}_4$ ; ( $\diamond$ ), 1 mM  $\text{Na}_2\text{HPO}_4$ . **C.** Activity with high  
37 phosphate concentrations: ( $\square$ ), no addition; ( $\nabla$ ), 3 mM Pi; (o), 10 mM Pi; ( $\diamond$ ), 25 mM Pi.

38  
39 **Figure 4S. Substrate requirements for GAPDH activity.** GAPDH activity was assayed as  
40 described in *Experimental procedures* with the indicated combinations of 1 unit of commercial  
41 rabbit GAPDH, 0.6 mM  $\text{NAD}^+$ , 0.6 mM G3P, 10 mM DTT, or with the indicated arsenicals at 0.1  
42 mM, final concentration. **A:** Specificity for arsenicals: ( $\Delta$ ), none; ( $\blacktriangledown$ ), As(V); ( $\square$ ), As(III); ( $\diamond$ ),  
43 MAs(III); ( $\nabla$ ), MAs(V); (o), DMAs(V). **B:** Requirement for the components of the GAPDH  
44 reaction. ( $\Delta$ ), GAPDH, G3P,  $\text{NAD}^+$  and As(V); ( $\diamond$ ), G3P,  $\text{NAD}^+$  and As(V); ( $\nabla$ ), GAPDH,  $\text{NAD}^+$   
45 and As(V); ( $\square$ ), GAPDH, G3P and  $\text{NAD}^+$ ; (o), GAPDH, G3P and As(V).

46  
47 **Figure 5S. Arsenate dependence of GAPDH activity.** GAPDH activity was assayed as  
48 described in *Experimental procedures* with 1 unit of commercial rabbit GAPDH, 0.6 mM  $\text{NAD}^+$ ,  
49 0.6 mM G3P, 10 mM DTT and the indicated concentrations of As(V). A  $K_m$  of 0.46 mM As(V)  
50 was calculated. Data are the mean  $\pm$  SE (n = 3).

51

52 **Figure 6S. GAPDH is not an arsenate reductase.** Reduction of As(V) to As(III) was assayed  
53 both *in vivo* and *in vitro*. **A:** Arsenate is not reduced in cells of *E. coli* W3110 (parental strain),  
54 AW3110 ( $\Delta arsRBC$ ) or WC3110 ( $\Delta arsC$ ) expressing the *Pseudomonas aeruginosa* DK2 *ars*  
55 operon *gapdh* gene (pGAPDH). **B:** Purified rabbit GAPDH reduced almost no As(V) to As(III)  
56 after 20 or 40 min of reaction with 1 unit of commercial rabbit GAPDH, 1.2 mM NAD<sup>+</sup>, 1.2 mM  
57 G3P, 10 mM DTT and 10  $\mu$ M As(V). Samples were speciated by HPLC using a C18 reverse  
58 phase column, and the amount of arsenic in relative counts per second (cps) was estimated by  
59 ICP-MS.

```

arsGAPDH      1  -----MAIKVGINGFGRIGRLALRAAWN---WPE----FEFVQINDPAGDAATHAH
PaGapA         1  -----MTIRLAINGFGRIGRNVLRALYTGHYREQ----LQVVAIND-LGDAAVNAH
PaGapB        121  VGKQNGDAREGTDVVLVYGFGRIGRLLARILIEKTGGGDGLRLRAIVVRKGAENDLVKRAS
EcGapA         1  -----MTIKVGINGFGRIGRIVFRAAQK---RSD----IEIVAIND-LLDADY MAY
O.cuniculus  1  -----MVKVGVNGFGRIGRLVTRAAFN---SGK----VDVVAINDPFIDLHYMVY

arsGAPDH      45  LINFDSVHGRWHHEASSD--GDSVVIGGKRIKKTANKAIADTDWS--GCD--LVIEASGK
PaGapA         47  LFQYDSVHGRFPGEVEHD--AESLRVMGDRIAVSAIRNPAELPWKSLGVD--IVLECTGL
PaGapB        181  LLRRDSVHGPF DGTITIDEENNTLTANGNLIQVIYSNDPASIDYTQYGIKNALLVDNTGK
EcGapA         44  MLKYDSTHGRFDGTVEVK--DGHLIVNGKKIRVTAERDPANLKWDEVGVD--VVAEATGL
O.cuniculus  44  MFQYDSTHGKFFHGTVKAE--NGKLVINGKAITIFQERDPANIKWGDAGAE--YVVESTGV

arsGAPDH      99  MKTVAVLQTYLD-QGVKRVVVSAPVKEKGALNVVMGVNQHLFDPAQHRIVTAASCTTNCL
PaGapA        103  FTSRDKAAAHLQ-AGAGKVLISAPGKDVDA-TVVYGVNHEVLR-ASHRIVSNASCTTNCL
PaGapB        241  WRDAEGLGQHLKCPGIDRVVLTAPGKGALK-NIVHGINHTDIG-ADDKIISAASCTTNAI
EcGapA        100  FLTDETARKHIT-AGAKKVVMTGPSKDNTP-MFVKGANFDKYA-G-QDIVSNASCTTNCL
O.cuniculus  100  FTTMEKAGAHLK-GGAKRVIIISAPSX-DAP-MFVMGVNHEKYD-NSLKIIVSNASCTTNCL

arsGAPDH      158  APVVKVIHENLGI RHGSIITTIHDLTNTQSILDQPHKD-LRRARASGMSLIPTTTGSATAI
PaGapA        160  APVAQVLHRELGI EHGMLTTIHAYTNDQNLSDVYHPD-LYRARSATQSMIPTKTGAAEAV
PaGapB        299  VPVLKAVNDQYGI VNGHVETVHSYTNDQNLI DN FHKG-SRRGRSAPLNMVITETGAATAA
EcGapA        156  APLAKVINDNFGIIEGLMTTVHATTATQKTVDGPSHKDWRGGRGASQNIIPSSTGAAKAV
O.cuniculus  156  APLAKVIHDHFGI VEGMLTTVHAITATQKTVDGPSGKLWRDGRGAAQNIIPASTGAAKAV

arsGAPDH      217  AEIFPELRGRLNGH A VRVPLANASLTDCVFEVERQTSADENVQLLKRAAENE-L-KDILG
PaGapA        219  GLVLPPELAGKLTGL AVRPVINVSLVDLTVQVARDTSVDEVNRLREASEGS----PVLG
PaGapB        358  AKALPVLKKGKLTGN AIRVPTPNVSMAILNLNLEKATTREETNEYLRQMAMHSDLQKQIDF
EcGapA        216  GKVLPELNGKLTGM AFRVPTPNVSVVDLTVRLEKAATYEQIKA AVKAAAEGE-M-KGVLG
O.cuniculus  216  GKVIPELNGKLTGM AFRVPTPNVSVVDLTCRLEKAAKYDDIKKVVKQASEGP-L-KGILG

arsGAPDH      275  YEERPLVSIIDYRTDPRSSIIDALSTMV VNGTQVKLYAWYDNEWGYANRTVELAKLVGLAG
PaGapA        275  YNTQPLVSVDFNHDPRSSIFDANHT-KVSGRLVKAMAWYDNERGFSNRMLDSALALAAAR
PaGapB        418  VSSQEVVSTDFV GSRHAGVVDAEAT-ICNDNRVVLVWYDNEFGYSCQVVRVMEDMAGVN
EcGapA        274  YTEDDVVSTDFN GEVCTSVDKAGIALNDNFVKLVSWYDNETGYSNKVLDLIAHISK--
O.cuniculus  274  YTEDQVVSCDFNSATHSSTFDAGAGIALNDHFVKLISWYDNEFGYSNRVVDLMVHMASKE

```

*Pseudomonas* 1 ----MKALSSLSPEVROYLLVTGNYWAFTLTDGALRMLVVLHFHSLGYSPLQIAALFLFY  
*Shewanella* 1 MAKLTGFLSNISPEIROYLVTGNYWAFTLTDGALRMLVVLHFHSLGYSPLQIAMLFLFY  
*Marinobacter* 1 -----MNSAIRQYLVI TGNywaftLTDGALRMLVVLHFHSLGYSPLAIALLFLFY  
*Bermanella* 1 -----MALANLSTEIROYLIVTGNywaftLTDGALRMLVVLHFHSLGYSPESIAMLFLFY  
*Aeromonas* 1 -----MALTRLSPETROYLLVTGNYWAFTLTDGALRMLVVLVYFHLGYSPLAIASLFLFY  
*Oceanimonas* 1 -----MLNRLSPGIROYLVVTGNYWAFTLTDGALRMLVVLHFHSLGYSPLAIALLFLFY  
*Marinimicrobium* 1 -----MLAQLSPAIRQYLLITGNYWAFTLTDGALRMLVVLHFHSLGYSPLAIALLFLFY

*Pseudomonas* 57 EFGVVTNLVGGYLGARVGLNRTMNI GLAMQVVALMLTVP SALLTPVVMGAQALSgia  
*Shewanella* 61 EFGVVTNLVGGWLGARLGLNKTMMNVGLFMQIVALSMLLVP SGM LTVAVWMAAQALSgia  
*Marinobacter* 51 EFGVVTNLVGGYLGARLGLNRTMNI GLELQIVALLMLAVPAAALTVPVWMAAQALSgia  
*Bermanella* 56 EFGVITNLVGGWLGARLGLNRTMNI GLLLOIVALLMMLVPLEWLTVPVWMAAQALSgia  
*Aeromonas* 56 EFGVVTNLVGGWLGARLGLNRTMNI GLALQVVALGMLLAPSLWLTVPVVMGAQALSgia  
*Oceanimonas* 55 EFGVITNLVGGWLGARLGLNRTMNI GLALQVVALGMLLVPAAWLTVPVWMAAQALSgia  
*Marinimicrobium* 55 EFGVITNLVGGWLGARLGLNRTMNI GLLLOVVALSMLLVPAAMLTVPVWMAAQALSgia

*Pseudomonas* 117 KDLNKMSAKSSIKLLVPEAQGKLYKQWVAITLTSKNALKGVGFFLGGALLALLCFKKAVAL  
*Shewanella* 121 KDLNKMSAKSSIKLLVPEAQGELYKQWVAMITGSKNALKGAGFFLGGALLTLFGFQLAVAL  
*Marinobacter* 111 KDLNKMSAKSGIKLLVPEAQGRLYKQWVAITLTSKNALTKGVGFFLGGVLLMSAGFRGAVV  
*Bermanella* 116 KDLNKMSAKSAIKLLVPEAQGQLYKQVSIITGSKNALKGAGFFMGGVLLTALCFKKAVAL  
*Aeromonas* 116 KDLNKMSAKSSIKLLVPEAQGQLYQWVAITLTSKNALKGMGFFLGGALLTLIGFOGAVL  
*Oceanimonas* 115 KDLNKMSAKSSIKLLVPEAQGTLYQWVAITLTSKNALKGVGFFMGGALLMGLGFAGAVA  
*Marinimicrobium* 115 KDLNKMSAKSSIKLLVPEAQGALYKQWVAITLTSKNALKAGFFLGGALLMALGFAGAVG

*Pseudomonas* 177 AMAVVLALIVWGSMLSLKKDLGKAKAKPKFERDMLSKSRAINILSAARMLFGARDVWFVV  
*Shewanella* 181 GMAIGLLLVWIFSLLSLQDLGKAKNPKPFEIIFSKSSSVNTLSAARMLFGARDVWFVV  
*Marinobacter* 171 AMAVVLGLVWLASLFLGODLGKSKAKPKFSIDLKSRAINVLSAARMLFGARDVWFVV  
*Bermanella* 176 AMASMLILVWLFSLIAKLELGGKAKNPKPFSOLF SKSTAINVLSAARMLFASRDVWLVV  
*Aeromonas* 176 VMALALALVWCISMLTLKRDLGKAKNPKPFEIIFSKSRAINVLSAARMLFGARDVWFVV  
*Oceanimonas* 175 AMAVALTLVWLLSLMLLTDLGGKAKQPKPFERDMLSKSRAINLLSAARMLFGARDVWFVV  
*Marinimicrobium* 175 SMAALLFVWIASLIFLRKDLGRAKSKPKPSEIIFSKSTAVNVLSAARMLFGARDVWFVV

*Pseudomonas* 237 ALPVYLSETLSWDFWL VGGFLAAWVIGYGI VQSFAPALTGKKR---GHVPDGRAAFI WAL  
*Shewanella* 241 ALPVYLASAFGWDHWYVGGFLALWVIGYGI VQGFAPRLTGTKSASQNKVPDGRSALGWAA  
*Marinobacter* 231 ALPVYMATVFGWDHWQVGGFLACWVIGYGEVQTVAPRITGLASGK-----AGAVFWAA  
*Bermanella* 236 ALPVYLASQFNWDHWT VGGFLALWVIGYGEVQTOAPNITGAKR---GKHPDGKTAALWAL  
*Aeromonas* 236 ALPVYLASSLGDWNGYVGSFLALWV IAYGVVQTOAPRFTGKRE---GRVPDGKVAMGWAL  
*Oceanimonas* 235 ALPVFLSQSLGWHHGQTGGFMALWVIGYGLVQALAPRVTKGAA---GNVPDGRVATGWAL  
*Marinimicrobium* 235 ALPVFLASQFDWDHWK VGGFLALWVIGYGA VQSVAPRITGRNT---GTPDGRATFGWAL

*Pseudomonas* 294 ILAVLPAATIALGLDMNLSAQIVLLGGLMIFGALFAVNSSLHSYLIVSYAKEDGVSLDVGF  
*Shewanella* 301 ILSIVPAGIALAISYDFHAANILIWGLMIFGALFAINSSLHSYLIVSYADEEDGVSLDVGF  
*Marinobacter* 284 LLAGVPAAMAGALVVGWPEWVIGGLLFGILFAINSSLHSYLIVRYARGDGVSLDVGF  
*Bermanella* 293 VMAGLPALIALALSNDSYTLISIVFGLLIFGFVFAINSSVHSYLIVSYASNDGVSLDVGF  
*Aeromonas* 293 VLALTPALIALALHFDLHPAISLVGGLMVFALFAINSSLHSYLIVSYAGSDGVSLDVGF  
*Oceanimonas* 292 GLTLVPGLIALGLMTGLNPAMVLI GGLLIFGALFAVNSSLHSYLIVSHAGRDGVSLDVGF  
*Marinimicrobium* 292 GLTLVPALIALALLGDVAPQWSLLGGLMVFGLFAVNSSLHSYLIVSYAKEDGVSLDVGF

*Pseudomonas* 354 YYMSNAMGRLLGTVLSGWVFOAY----GLVACLWISAAFLVLLAALISIALPRHAEVVT  
*Shewanella* 361 YYMANAMGRLLGTVLSGWVYQVY----GMAACLWISAAFLAALALISIKLPRHRAI---  
*Marinobacter* 344 YYMSNAAGRLMGTLLSGWVYQAW----GLEACLWISAAFLVAMAALLSLGLPDRRDAIIG  
*Bermanella* 353 YYMANAMGRLLGTVLSGWLYQAY----GLEACLWVSSAFLILTFIISLALPKEGTAKPS  
*Aeromonas* 353 YYMANALGRLLGTVLSGLVFOQLH----GLEACLWVSTLFIILLAALISLGLPRHQPPVSS  
*Oceanimonas* 352 YYMANAMGRLLGTVLSGGLFQWAGQGSAGMQACLWVSMFLLLTTLISLRLPRSVVN---  
*Marinimicrobium* 352 YYMANAMGRLLGTVLSGWVYQVA----GLVACLWISAAFLALATVIALALPRRD-----

*Pseudomonas* 409 PN-----  
*Shewanella* -----  
*Marinobacter* 399 EQRFV-  
*Bermanella* 408 -----  
*Aeromonas* 408 QSHGVS  
*Oceanimonas* -----  
*Marinimicrobium* -----

Figure 3S

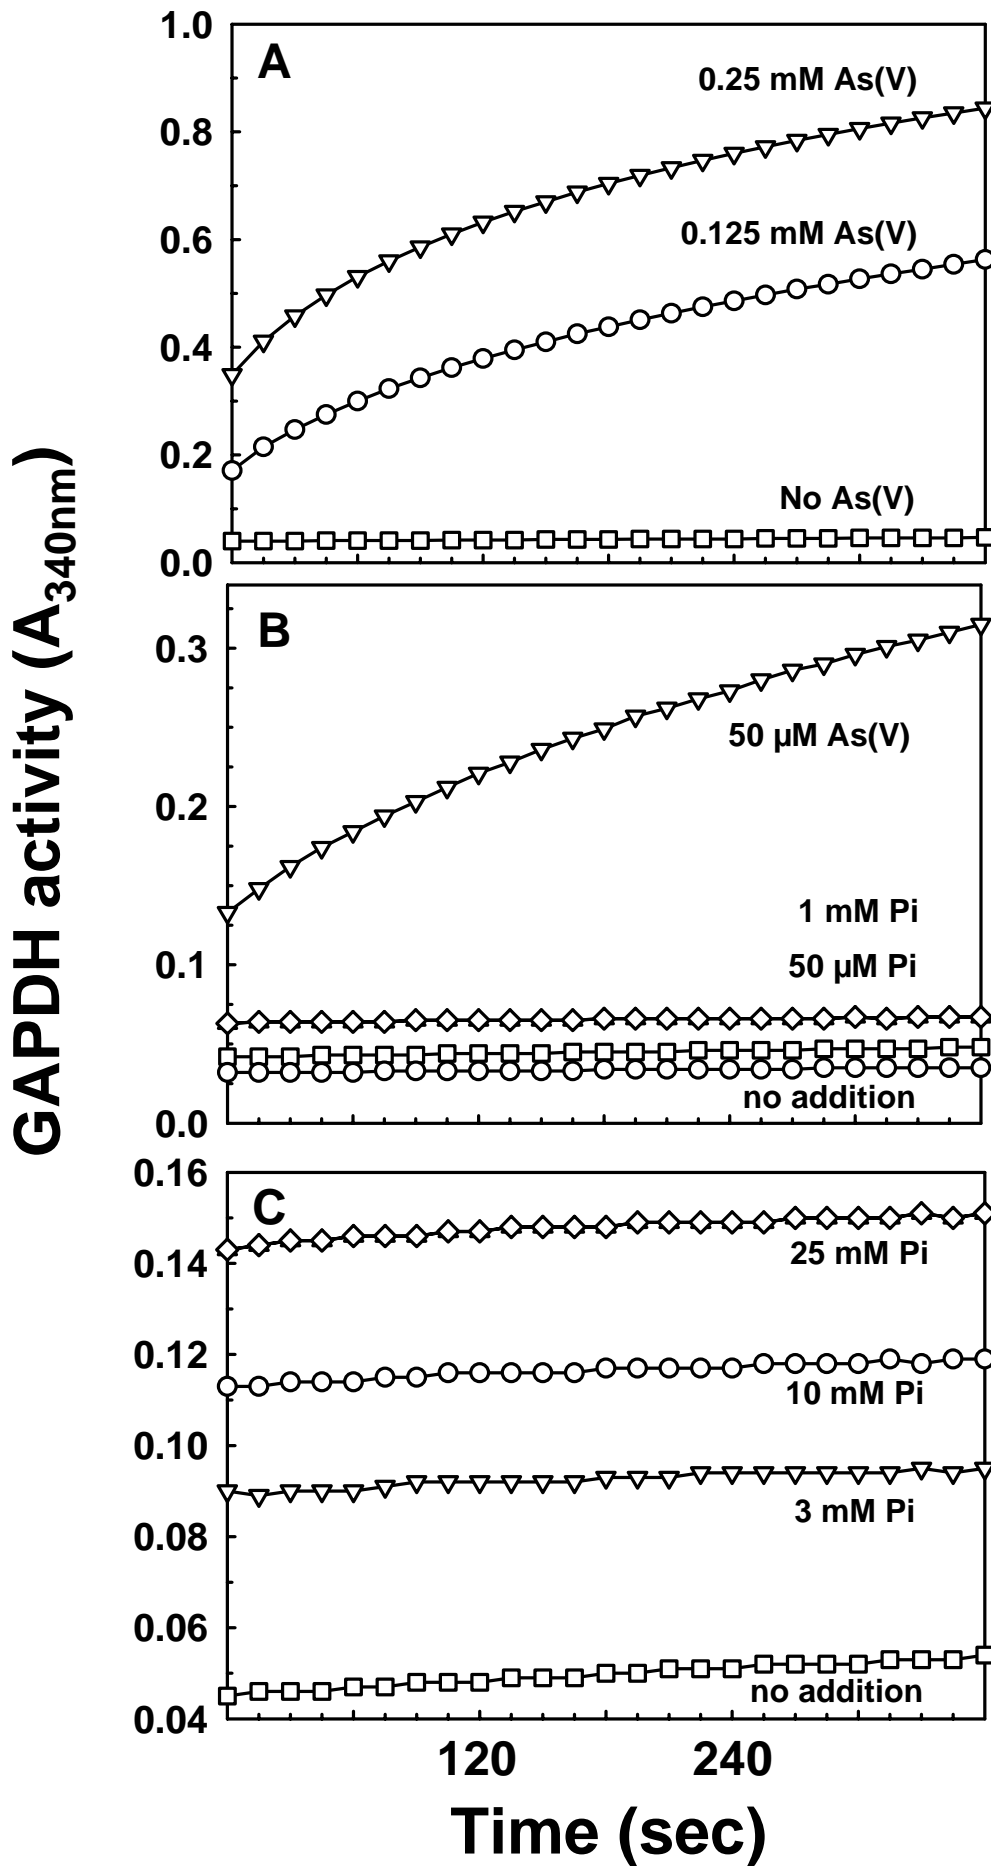

Figure 4S

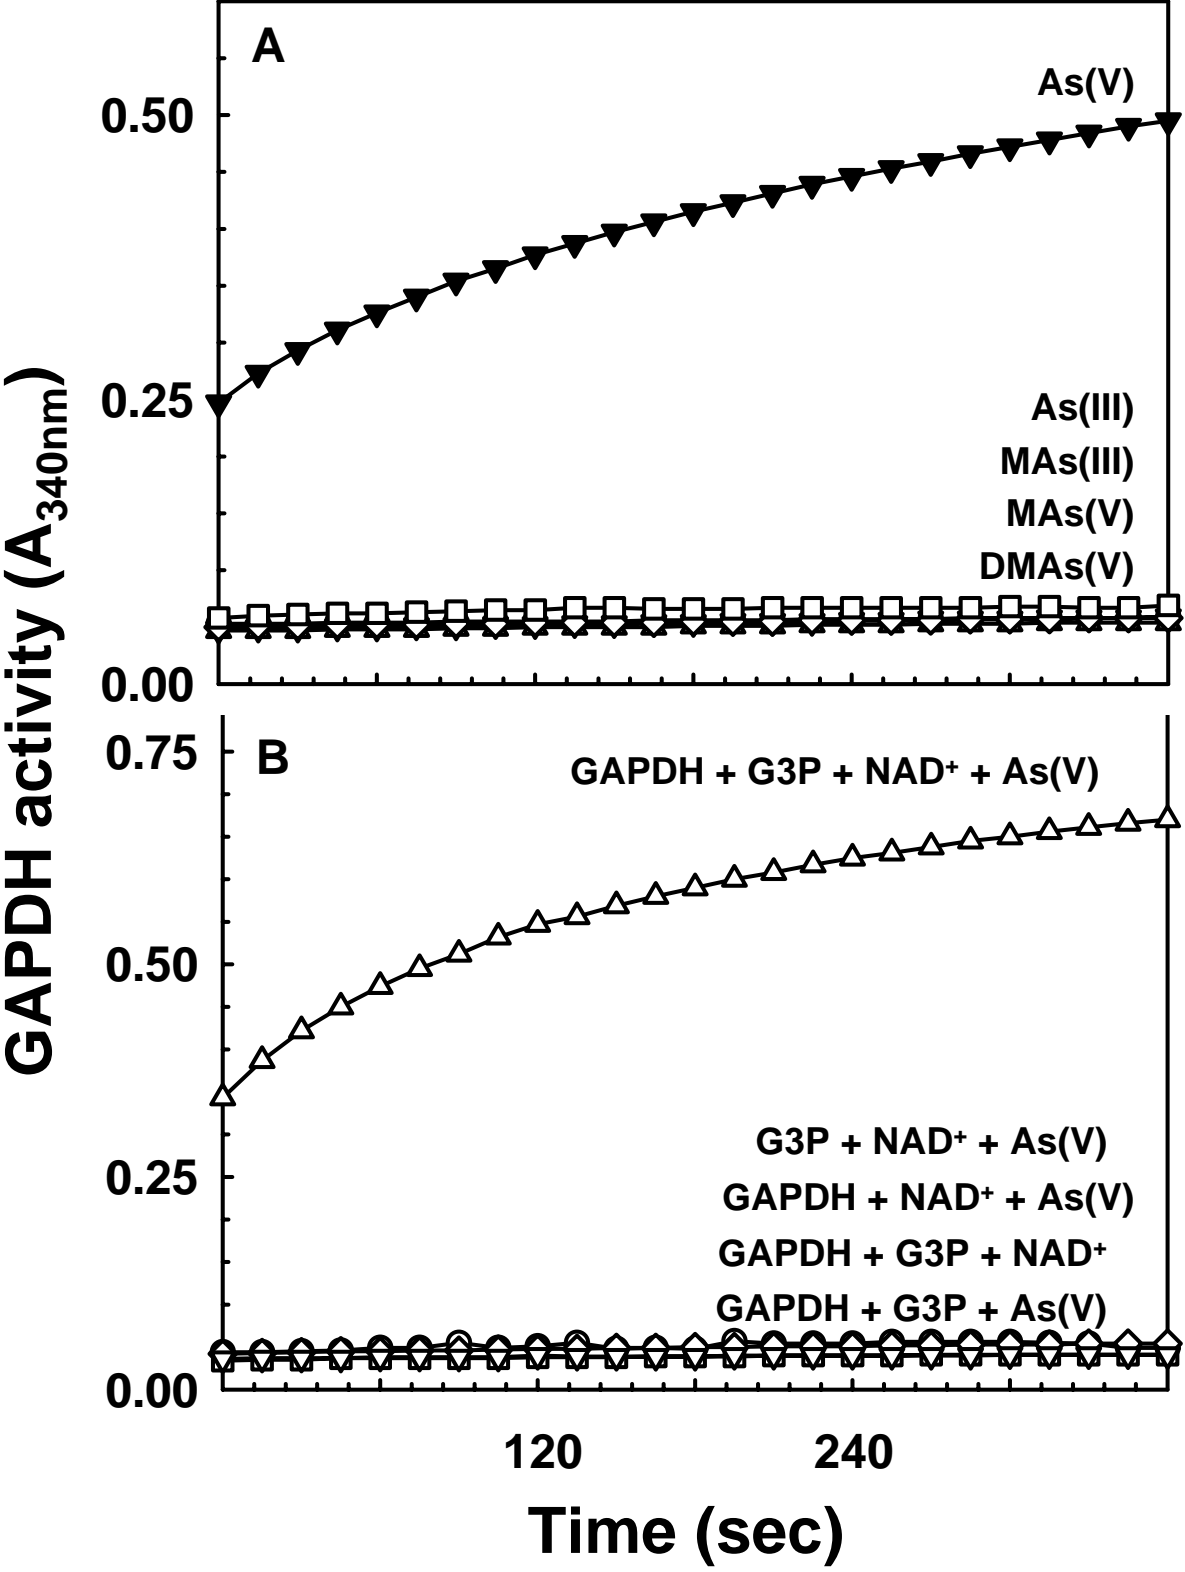

Figure 55

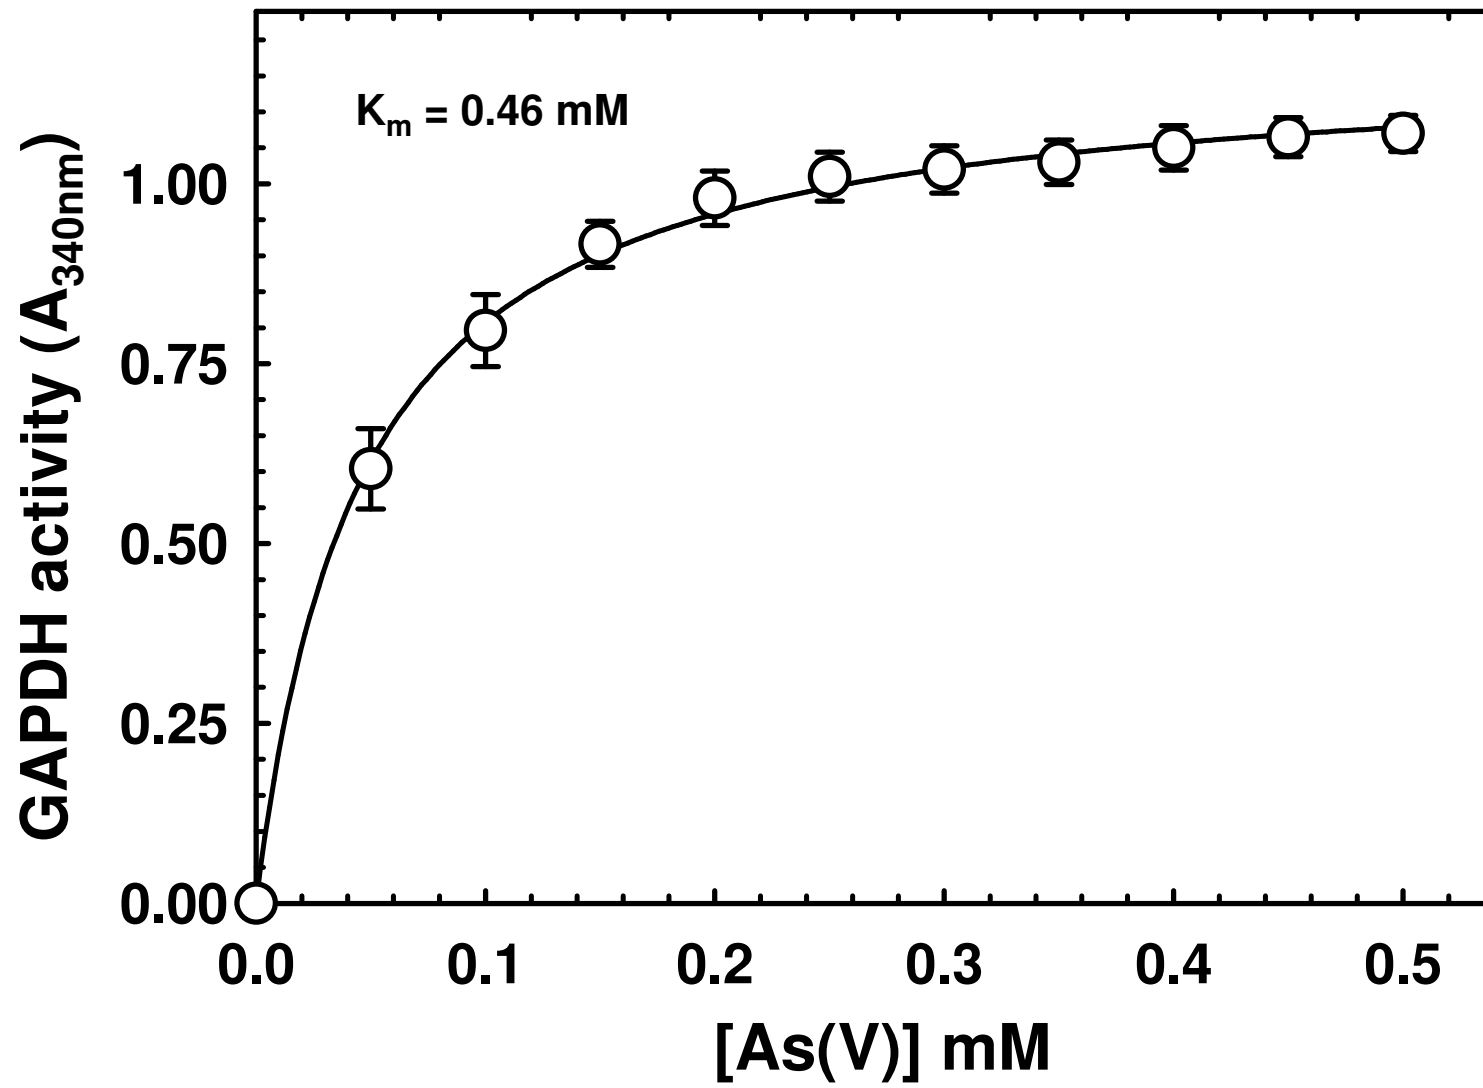



Figure 6S

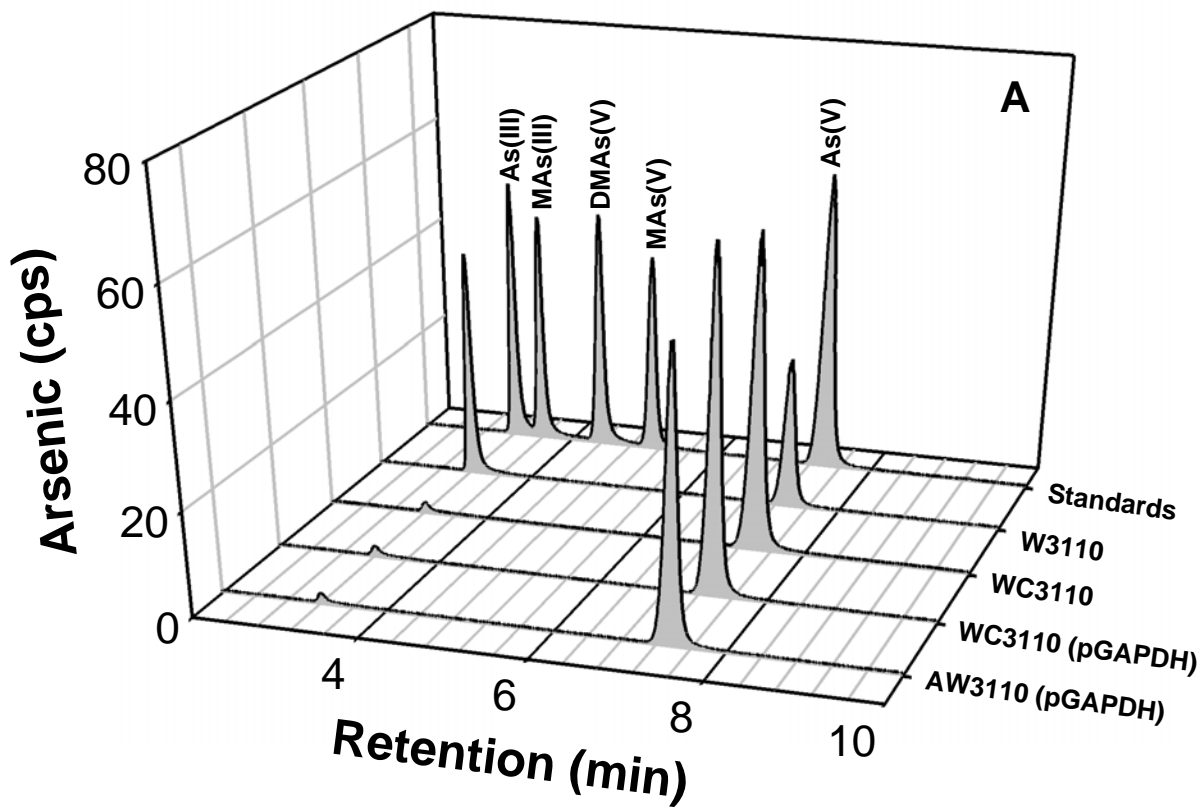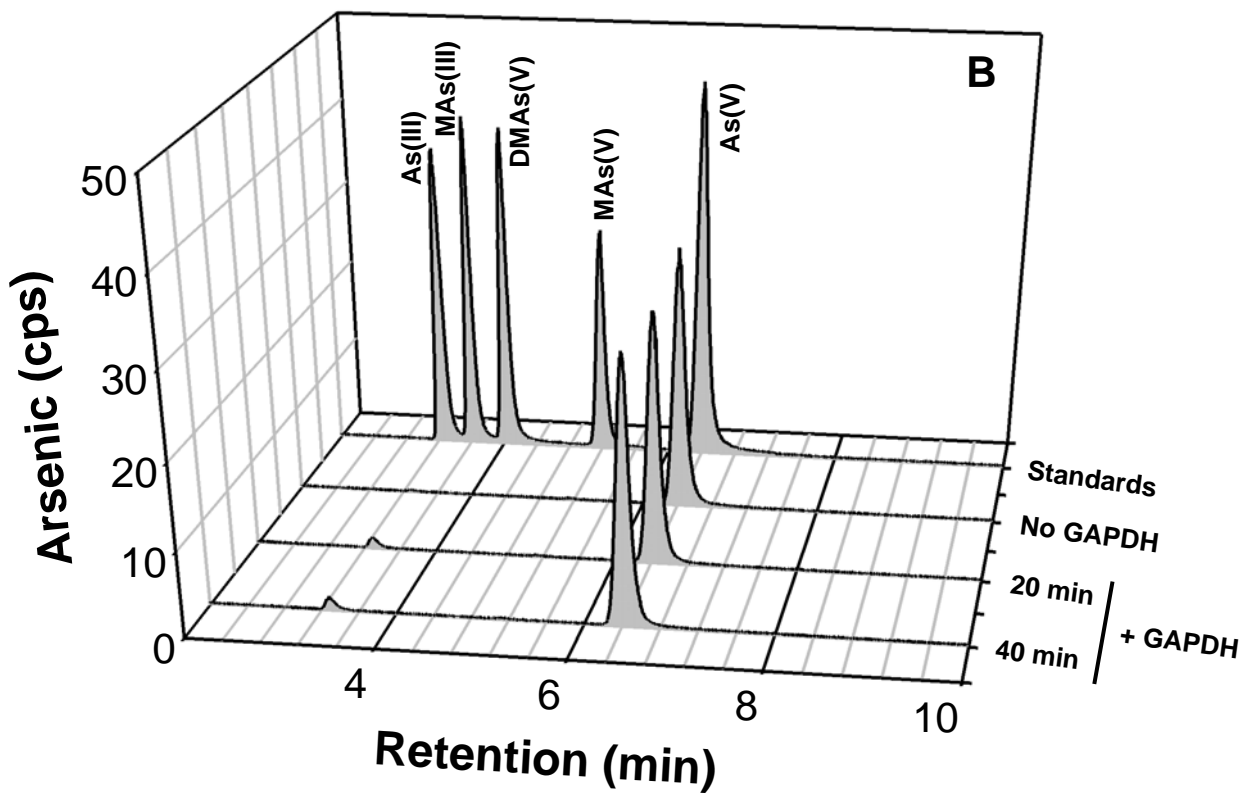

Supplement: NIHMS808899-supplement-supplement_1.pdf [file NIHMS808899-supplement-supplement_1.pdf]
